# Supplementary material
Source: PubMed Central journal article supplement (PMC4734586)
Supplement: supp_pp.15.01727_PP2015-01727DR2_Supplemental_Material.pdf [file supp_pp.15.01727_PP2015-01727DR2_Supplemental_Material.pdf]

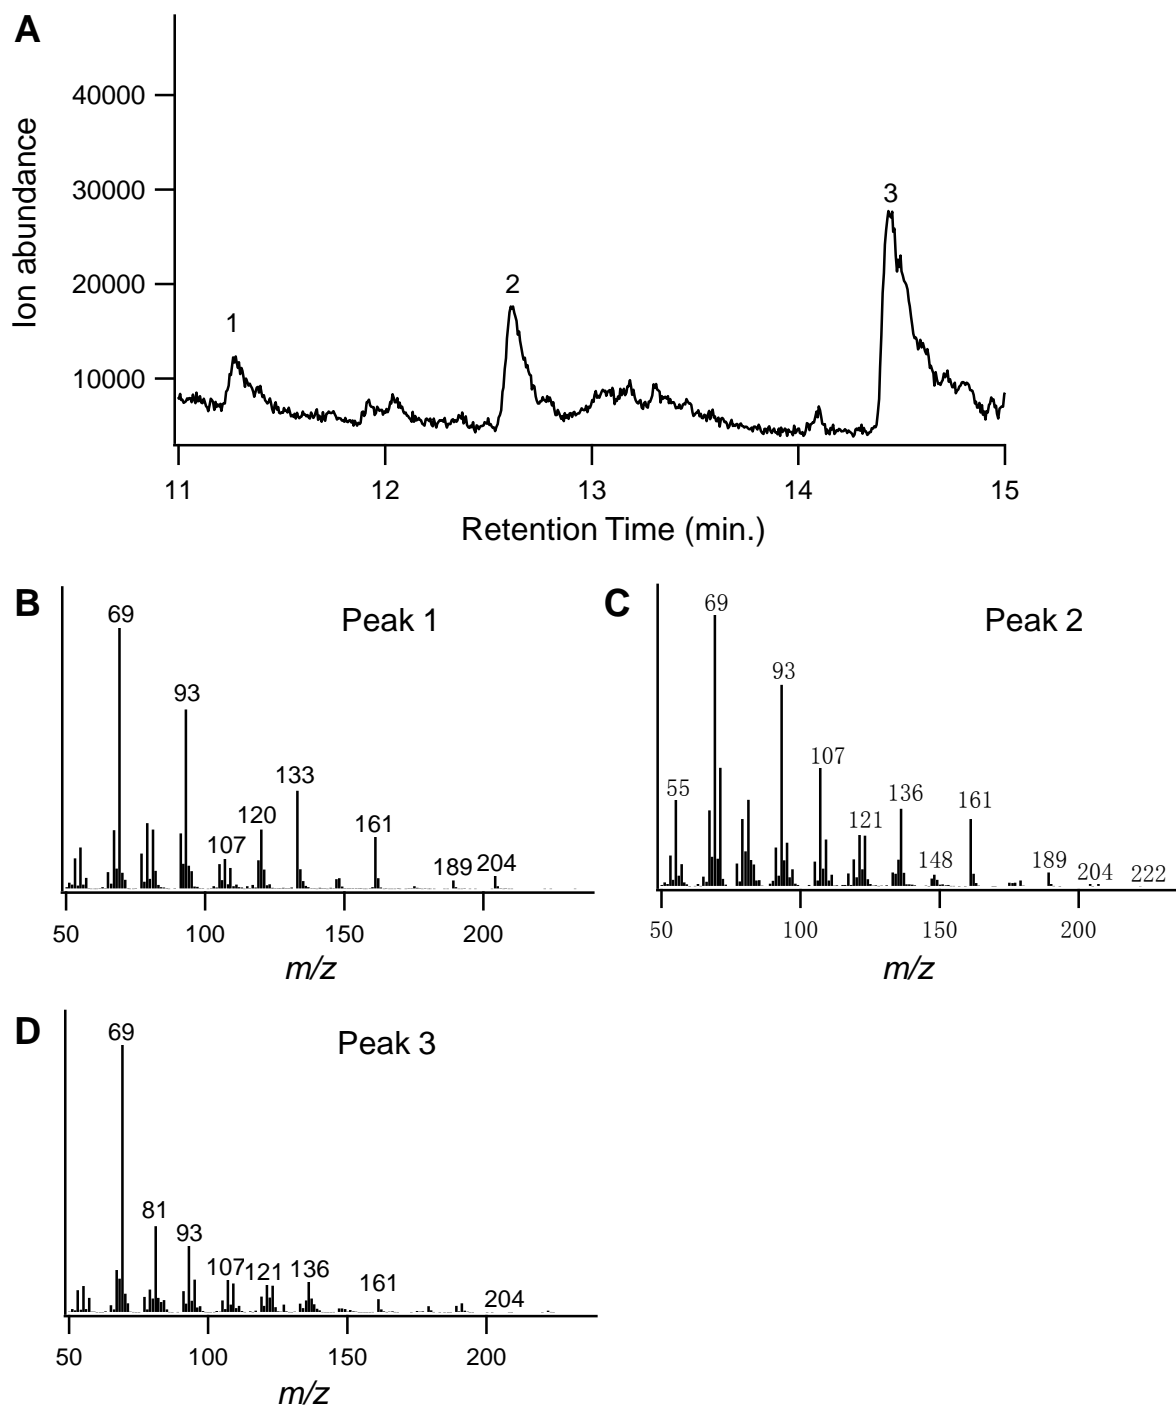

**Supplemental Figure S1.** GC-MS analysis of ZmTPS1 sesquiterpene products.

A, Total ion chromatogram of GC-MS analysis for coexpression products of ZmTPS1 and IspA (FPP synthase from *E. coli*).

B to D, Mass spectra of ZmTPS1 sesquiterpene products, which are identified through mass spectra comparison with that of NIST MS library as  $\beta$ -farnesene (Peak 1, B), nerolidol (Peak 2, C) and farnesol (Peak 3, D).

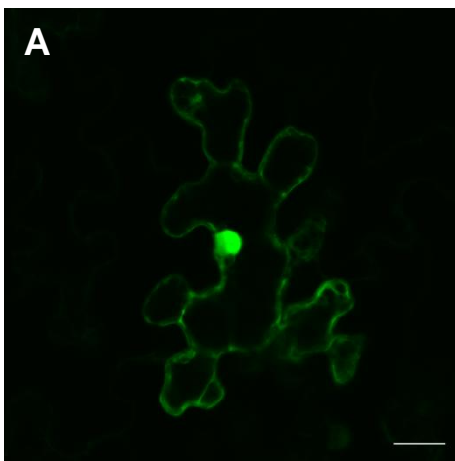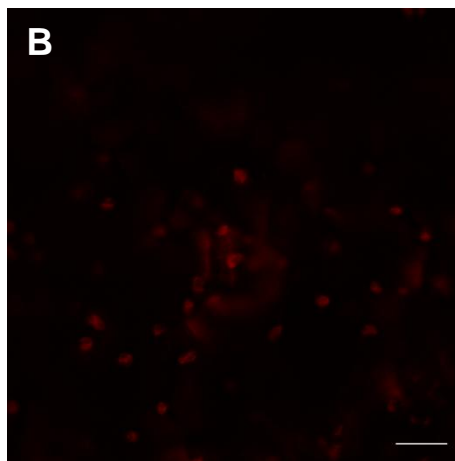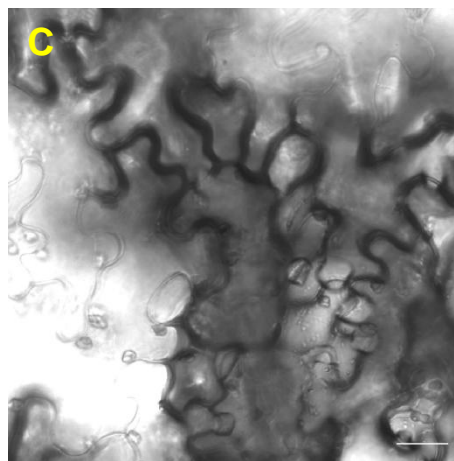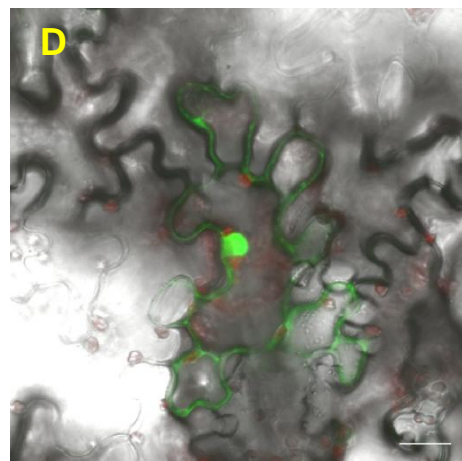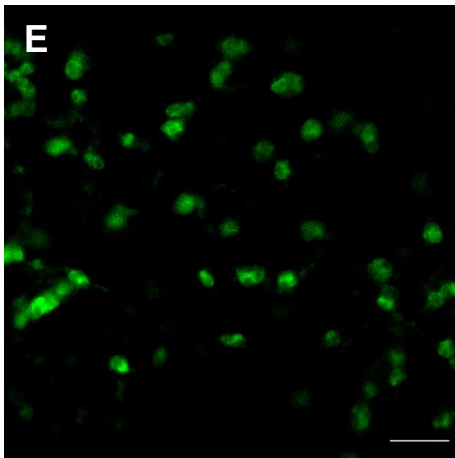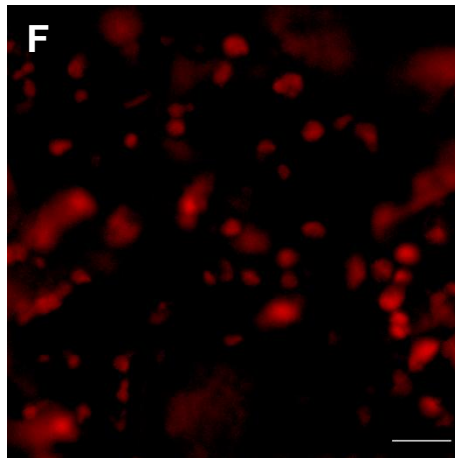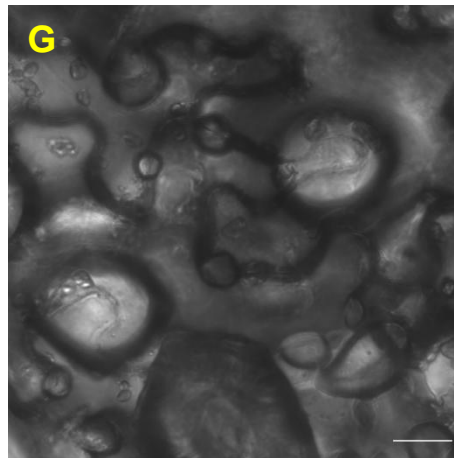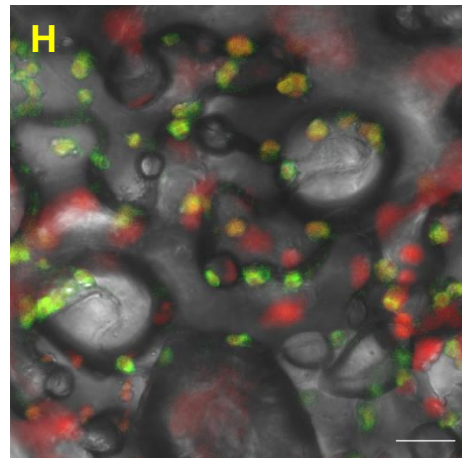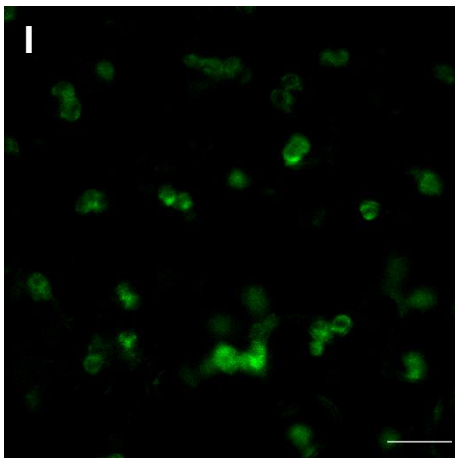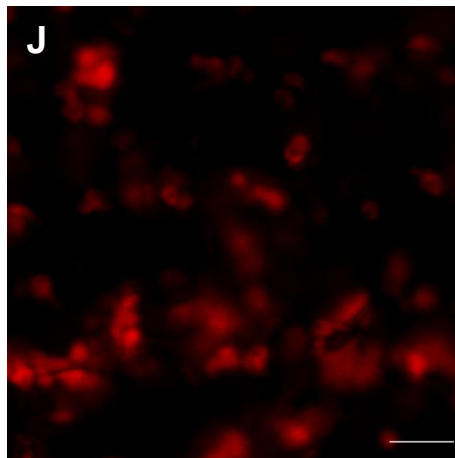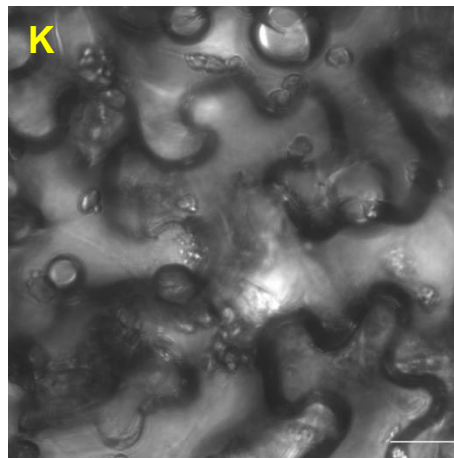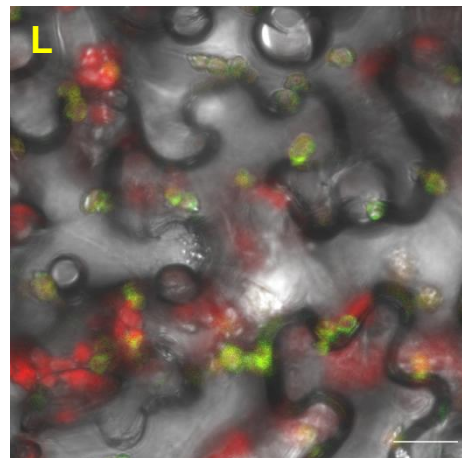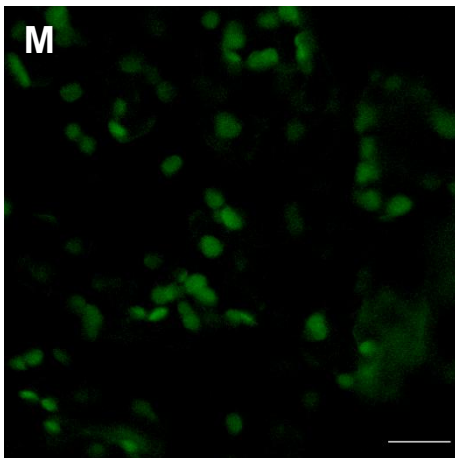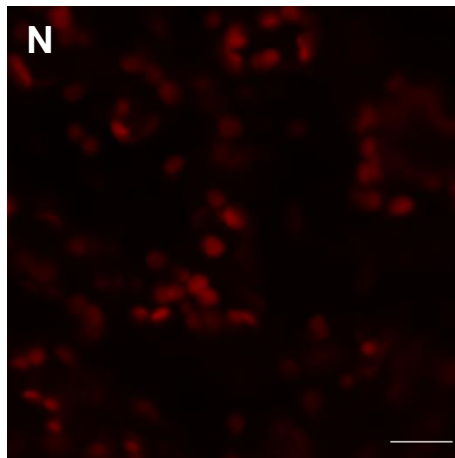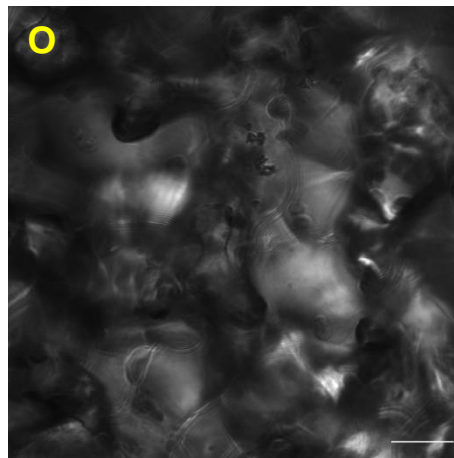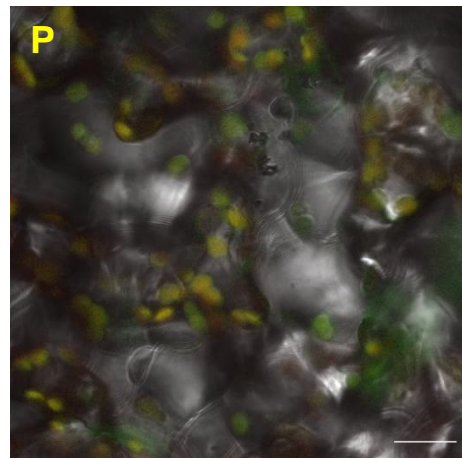

**Supplemental Figure S2.** Plastidic localization of ZmTPS1, ZmKSL5 and ZmKSL3. Images of the leaf epidermis of *N. benthamiana* expressing different eGFP fusion protein are shown, eGFP (A to D), eGFP fused to ZmTPS1 (E to H), eGFP fused to ZmKSL5 (I to L) and eGFP fused to ZmKSL3 (M to P). All expression was controlled with CaMV 35S promoter.

A, E, I and M, eGFP fluorescence.  
B, F, J and N, Chlorophyll autofluorescence.  
C, G, K and O, Bright-field image.  
D, H, L and P, Overlay images.  
Scale bar indicates 20  $\mu\text{m}$ .

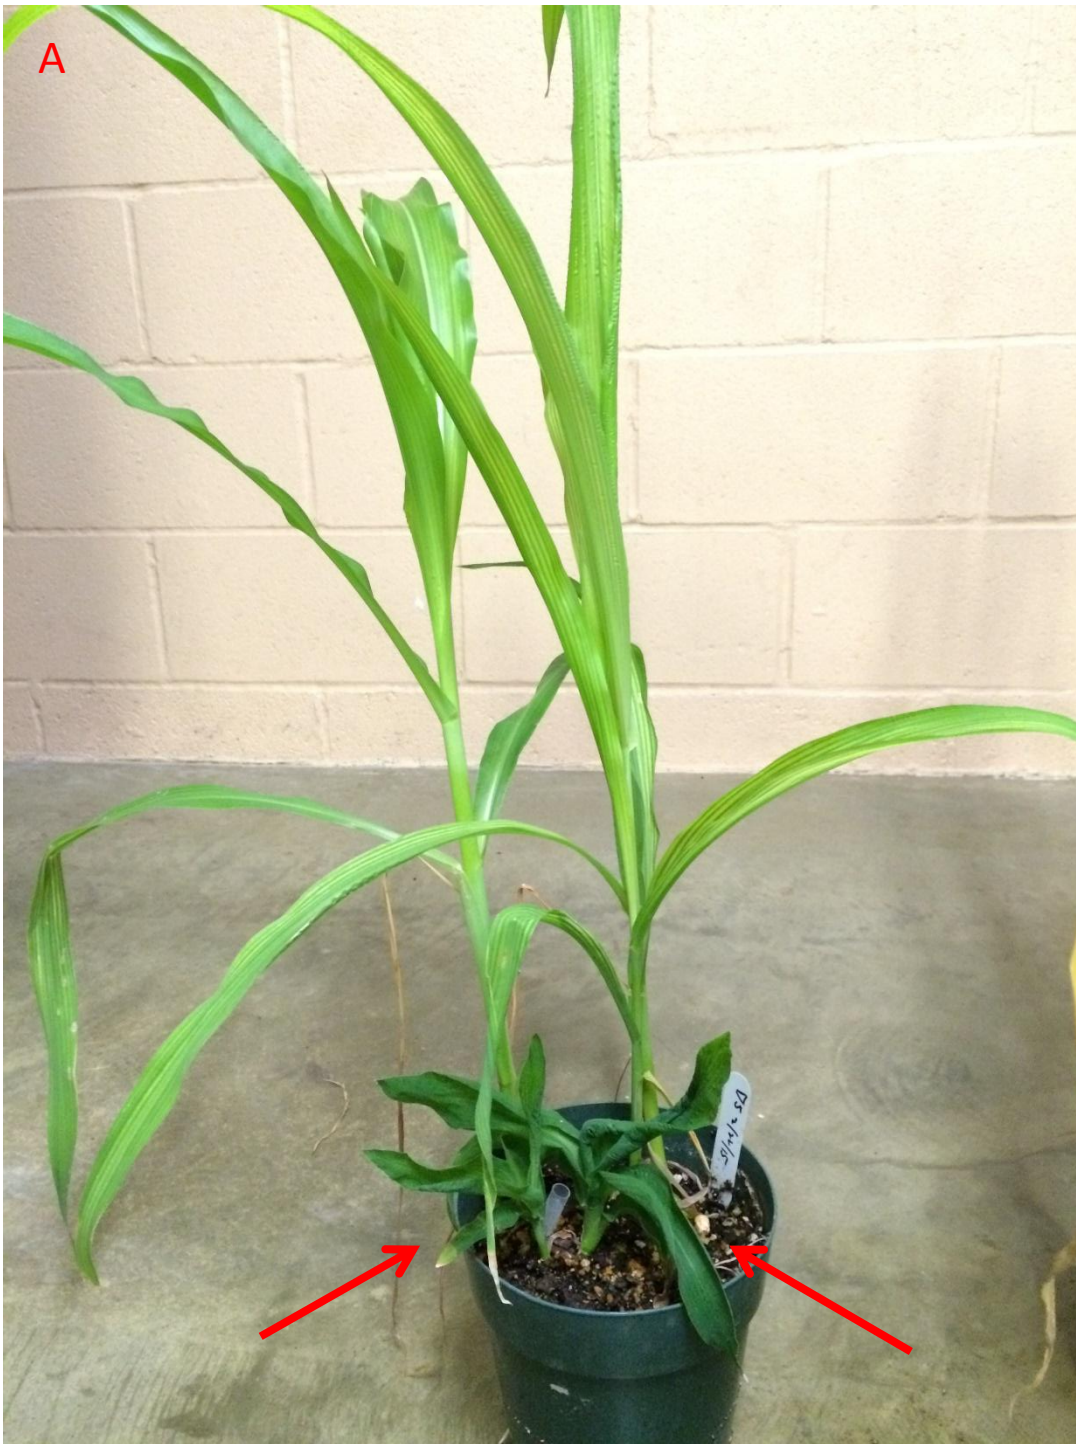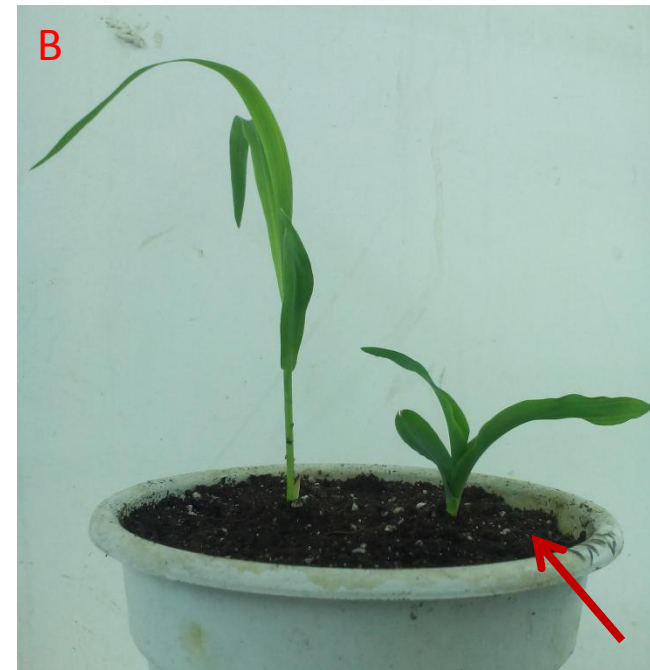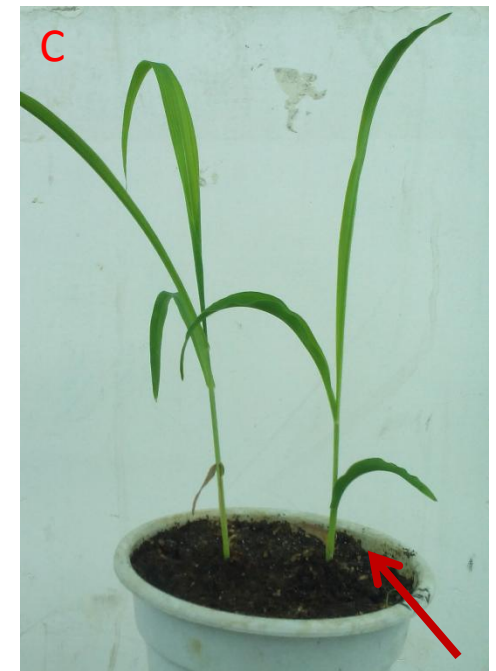

**Supplemental Figure S3.** Maize *d5* mutant seedlings and height restoration by GA treatment.

A, The *d5* mutants showed dwarfism (marked with red arrow).

B, The 10 days *d5* mutant (marked with red arrow) and WT seedling.

C, The height restoration of *d5* (marked with red arrow) with GA treatment.

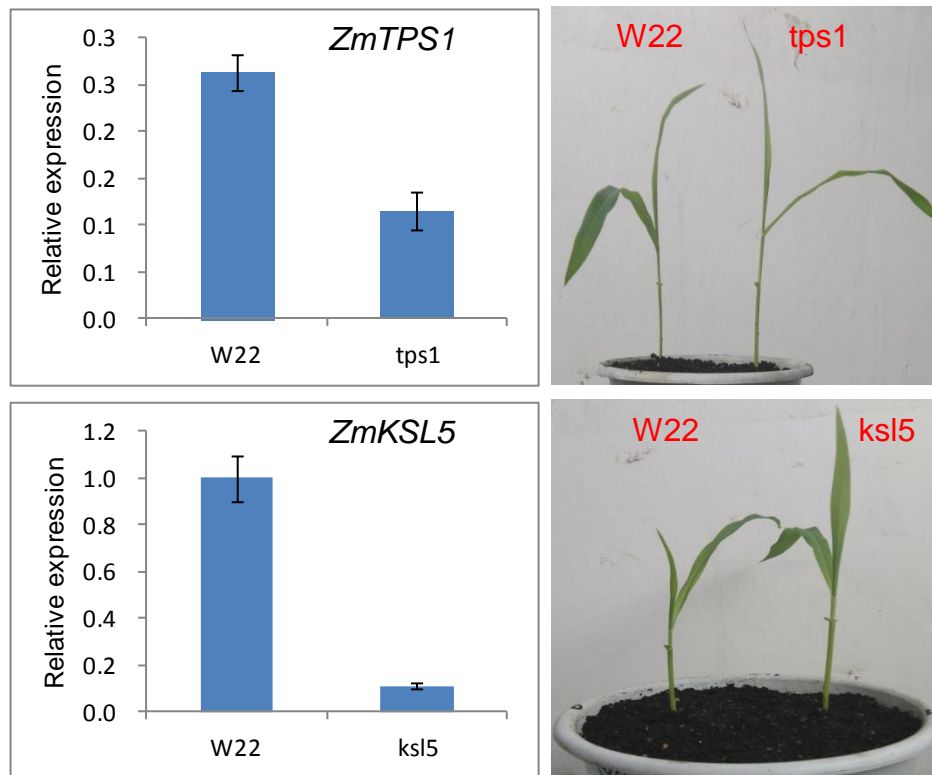

**Supplemental Figure S4.** *ZmTPS1* and *ZmKSL5* mutants did not show dwarf phenotype. Gene expression of *ZmTPS1* and *ZmKSL5* was analyzed with qRT-PCR to identify their mutants, in comparison to that of wild type line W22.

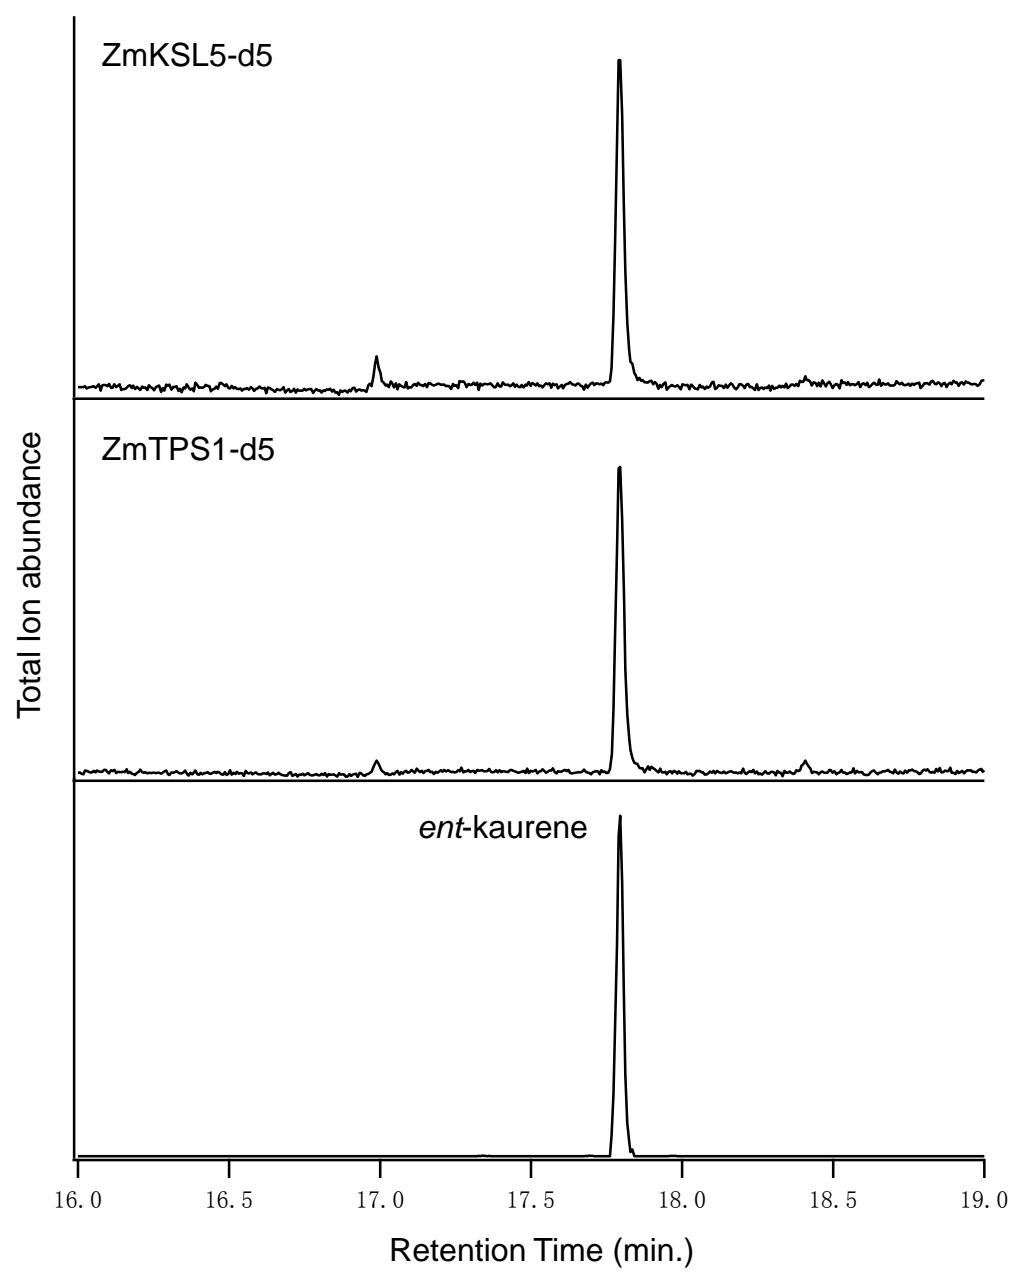

**Supplemental Figure S5.** GC-MS analysis of KS activity for ZmTPS1 and ZmKSL5 in *d5*.



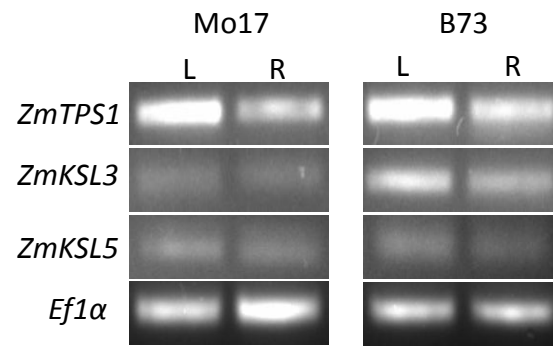

**Supplemental Figure S7.** Constitutive gene expression pattern of *ZmTPS1*, *ZmKSL3* and *ZmKSL5*. RT-PCR analysis for constitutive expression of three KS genes in root (R) and above ground tissues (L) of Mo17 and B73 young seedling. *Ef1α* was used as control.



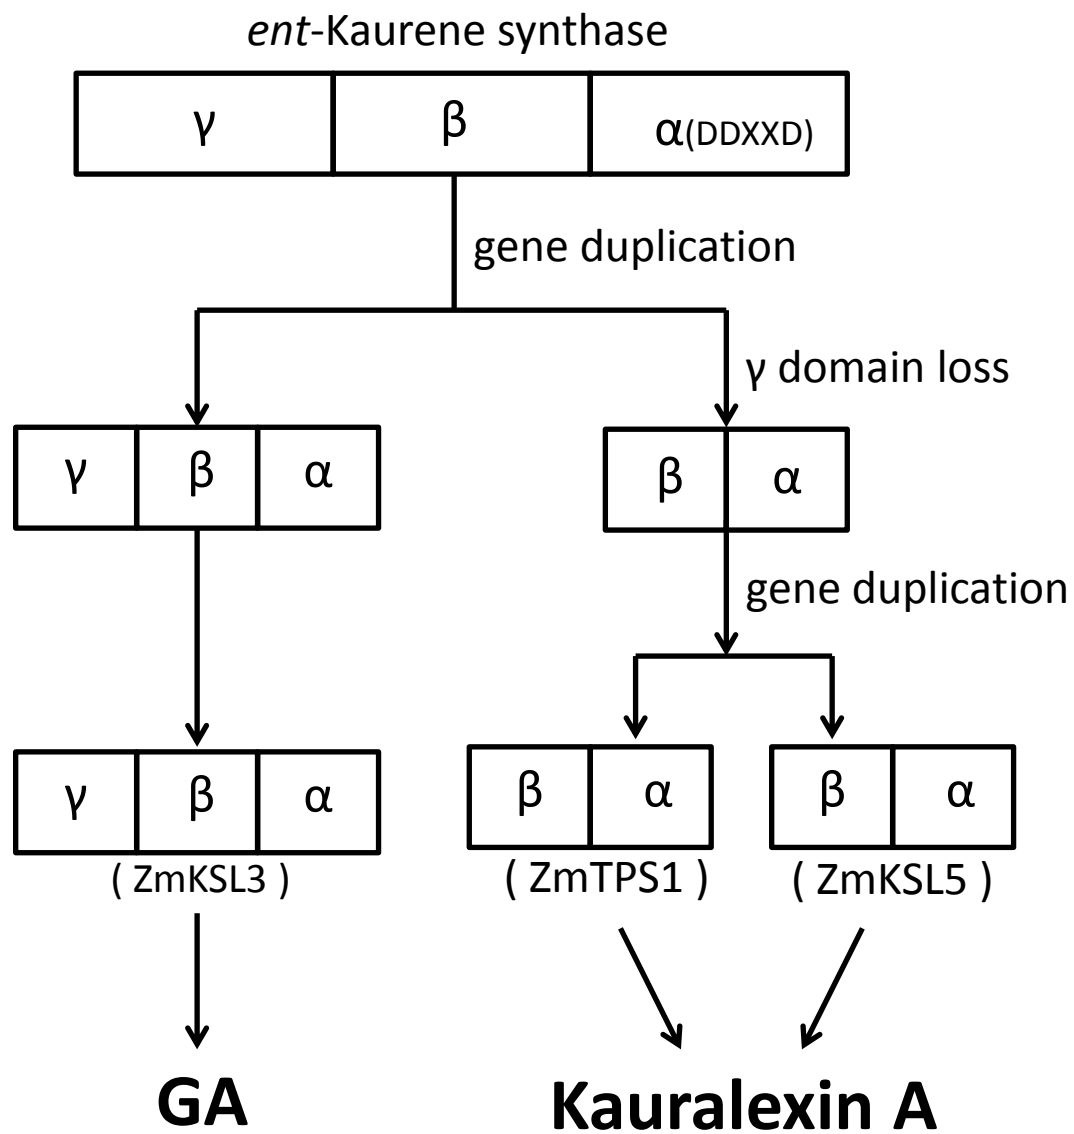

**Supplemental Figure S8.** Proposed evolution of maize tandem KS gene array.

**Supplemental Table S1.** Plastid localization prediction results

|        | ChloroP | Predator | PCLA | iPSORT |
|--------|---------|----------|------|--------|
| ZmKSL1 | —       | —        | —    | —      |
| ZmKSL2 | Y       | —        | Y    | Y      |
| ZmKSL3 | Y       | Y        | —    | Y      |
| ZmKSL4 | Y       | Y        | Y    | Y      |
| ZmKSL5 | Y       | Y        | Y    | Y      |
| ZmTPS1 | Y       | Y        | Y    | Y      |
| TaKSL5 | Y       | —        | Y    | —      |

**Supplemental Table S2.** Predicted cis-regulatory elements in 1.5 kb promoter region of three KS genes.

|        | W-Box       | ABRE (ABA response)     | TCA (SA response) | CGTCA (MeJA response)          |
|--------|-------------|-------------------------|-------------------|--------------------------------|
| ZmKSL5 | -457        | -873, -1137, -298, -135 | none              | -756                           |
| ZmTPS1 | -1416, -928 | -33                     | -570              | -928, -813, -570               |
| ZmKSL3 | none        | none                    | none              | -487, -1046, -1043, -902, -763 |

**Supplemental Table S3.** Primers used for semiquantitative (S) and quantitative RT-PCR

| Primer                           | Sequence (5'-3')      | Amplicon size (bp) |
|----------------------------------|-----------------------|--------------------|
| <i>ZmKSL3</i> -F1<br>(S)         | GATCCGAGCAGAGGCAGAG   | 341                |
| <i>ZmKSL3</i> -R1<br>(S)         | ACGCAAGAACACATGCCAAC  |                    |
| <i>ZmTPS1</i> -F                 | CGGTGATCAATGAGCCACTA  | 173                |
| <i>ZmTPS1</i> -R                 | TGACAACATGTGCCAACTCC  |                    |
| <i>ZmKSL5</i> -F                 | TTCTGGAAAATGTGCAAGGTC | 103                |
| <i>ZmKSL5</i> -R                 | GCTCGTTGATCACTGCATTC  |                    |
| <i>ZmKSL3</i> -F                 | TGGGTTTCTATGGTGCCAGT  | 140                |
| <i>ZmKSL3</i> -R                 | AGAACATCCTTGCTGACCGA  |                    |
| <i>An2</i> -f                    | GATGATGAGCCATGTCGATG  | 113                |
| <i>An2</i> -r                    | GAAAGGTCTGCCTTGTCTCG  |                    |
| <i>Ef1<math>\alpha</math></i> -F | TGGTGTCATCAAGCCTGGTA  | 118                |
| <i>Ef1<math>\alpha</math></i> -R | AACATTGTCACCCGGAAGAG  |                    |

ZmKSL5-d5 ATGGCC AAGCCACTGAACCTGACTCCTGCCTTCTCTCGCTGATGGCCACCAGCTGCCGCTTCAGCTCC 69  
ZmKSL5 ATGGCC AAGCCACTGAACCTGACTCCTGCCTTCTCTCGCTGATGGCCACCAGCTGCCGCTTCAGCTCC 69

ZmKSL5-d5 GCGGGCATGCGCACCGCTTCGCCCTCGTCGCTACCGTGCGGGAGGACGACGCCGACGCCACGGACCACG 138  
ZmKSL5 GCGGGCATGCGCACCGCTTCGCCCTCGTCGCTACCGTGCGGGAGGACGACGCCGACGCCACGGACCACG 138

ZmKSL5-d5 TCGTCGCTACCGCGCCCTGCGGCTCAGGTTAGCCCTGACAGAAGCAAGCAACGCGATGACGAAGCAGCA 207  
ZmKSL5 TCGTCGCTACCGCGCCCTGCGGCTCAGGTTAGCCCTGACAGAAGCAAGCAACGCGATGACGAAGCAGCA 207

ZmKSL5-d5 TCGGAGACTACGATAAAGGCAGCAGCTCCAGCAAGTCGATGTGCTTGAGAACACGGGGATTTCTCGGCAT 276  
ZmKSL5 TCGGAGACTACGATAAAGGCAGCAGCTCCAGCAAGTCGATGTGCTTGAGAACACGGGGATTTCTCGGCAT 276

ZmKSL5-d5 TTTGCTGGTGAAATCAAGTGTATCCTTGACAGGACATACAGATGTTGGTTAGAGAGGCACGAGGAAATT 345  
ZmKSL5 TTTGCTGGTGAAATCAAGTGTATCCTTGACAGGACATACAGATGTTGGTTAGAGAGGCACGAGGAAATT 345

ZmKSL5-d5 ATGCAGGACACAACAACATGTGCGATGGCATTTCGTATTCTAAGGATGAACGGATATGATGTCTCTTGT 414  
ZmKSL5 ATGCAGGACACAACAACATGTGCGATGGCATTTCGTATTCTAAGGATGAACGGATATGATGTCTCTTGT 414

ZmKSL5-d5 GATCTGTTGTATCATGTTGTTGAAACATCCGGGATCCATGATCCACTTAGGGGACATTTGAATGACACA 483  
ZmKSL5 GATCTGTTGTATCATGTTGTTGAAACATCCGGGATCCATGATCCACTTAGGGGACATTTGAATGACACA 483

ZmKSL5-d5 AGAACCTTGTAGAAATTACACAAGGCCCTACAGTTAGTATCTCTGAAGACGAGTCTATCCTGGATAGC 552  
ZmKSL5 AGAACCTTGTAGAAATTACACAAGGCCCTACAGTTAGTATCTCTGAAGACGAGTCTATCCTGGATAGC 552

ZmKSL5-d5 ATAGGCTTAAGGTC AAGTACCTTACTGAGGGAACAATGGAGTCTAGTGGTGCTCTACAAAATCCTCCA 621  
ZmKSL5 ATAGGCTTAAGGTC AAGTACCTTACTGAGGGAACAATGGAGTCTAGTGGTGCTCTACAAAATCCTCCA 621

ZmKSL5-d5 CTCTTTAGAGAGGTGGAACATGCTCTGTACCATCCCTTCTACGCCACATTTGGACCGTCTAACCACAGG 690  
ZmKSL5 CTCTTTAGAGAGGTGGAACATGCTCTGTACCATCCCTTCTACGCCACATTTGGACCGTCTAACCACAGG 690

ZmKSL5-d5 TGGAACATTGAAAATTTCAATACTACAGAGCACCAGATGCTAGACACACCATACTTGTCAGTCGATAT 759  
ZmKSL5 TGGAACATTGAAAATTTCAATACTACAGAGCACCAGATGCTAGACACACCATACTTGTCAGTCGATAT 759

ZmKSL5-d5 ACCAGTAGAGATATTTCTAGCCTTGGGTATCAGAGACTCAATTCCTCTCAACTTACTTACCAGCAAGAA 828  
ZmKSL5 ACCAGTAGAGATATTTCTAGCCTTGGGTATCAGAGACTCAATTCCTCTCAACTTACTTACCAGCAAGAA 828

ZmKSL5-d5 CTTCAACATCTTAAAAGTTGGGTGAAAGAATGCAGTTGGACCAACTACCATTTGTGAGGCCAAAATTTG 897  
ZmKSL5 CTTCAACATCTTAAAAGTTGGGTGAAAGAATGCAGTTGGACCAACTACCATTTGTGAGGCCAAAATTTG 897

ZmKSL5-d5 GCATATCTTTATTTGTCGCTGCTGGCTGCATGTACTCCCTGAACTGCTGAAGCTCGCACATTTGTGT 966  
ZmKSL5 GCATATCTTTATTTGTCGCTGCTGGCTGCATGTACTCCCTGAACTGCTGAAGCTCGCACATTTGTGT 966

ZmKSL5-d5 GCAAAAAATGGTGCACCTATAAATGTTGTTGATGACTCTTTGATGTTGGAGGATCAAAAAGAAGAACTT 1035  
ZmKSL5 GCAAAAAATGGTGCACCTATAAATGTTGTTGATGACTCTTTGATGTTGGAGGATCAAAAAGAAGAACTT 1035

ZmKSL5-d5 GAAAACCTTGTCATGTTGGTTGAGCTGTGGGACGAGCATCGCAAAATGAGTTTTACTCAGAACATGTA 1104  
ZmKSL5 GAAAACCTTGTCATGTTGGTTGAGCTGTGGGACGAGCATCGCAAAATGAGTTTTACTCAGAACATGTA 1104

ZmKSL5-d5 GAGATTATATTTTCTTCAATTTACAACCTCAGTTAACCAGTATGGTGCAAAGGCTTCTTTGTTACAAGAC 1173  
ZmKSL5 GAGATTATATTTTCTTCAATTTACAACCTCAGTTAACCAGTATGGTGCAAAGGCTTCTTTGTTACAAGAC 1173

ZmKSL5-d5 CGCAATGTTACCAAACACCTAGTACAAATATGGTTGGATTTGCTAAAGTCTATGATGACAGAGGTAGAG 1242  
ZmKSL5 CGCAATGTTACCAAACACCTAGTACAAATATGGTTGGATTTGCTAAAGTCTATGATGACAGAGGTAGAG 1242

ZmKSL5-d5 TGGCGTTTGAACAAATATGTGCCAACAGAGGAGGAATACATGACAAATGCATCTTTAACATTTGCATTG 1311  
ZmKSL5 TGGCGTTTGAACAAATATGTGCCAACAGAGGAGGAATACATGACAAATGCATCTTTAACATTTGCATTG 1311

ZmKSL5-d5 GGTCCCATTTGATTTGCCAGCGTTGTATTTTGTGGACCGAAGATCCCGGAGTCTATTGTTAAAGATCCA 1380  
ZmKSL5 GGTCCCATTTGATTTGCCAGCGTTGTATTTTGTGGACCGAAGATCCCGGAGTCTATTGTTAAAGATCCA 1380

ZmKSL5-d5 GAATACGATGAGTTGTTCAAAGCTAATGAGCACATGTGGTCGACTCTTGAATGATGTTTCAGAGTTTTGAG 1449  
ZmKSL5 GAATACGATGAGTTGTTCAAAGCTAATGAGCACATGTGGTCGACTCTTGAATGATGTTTCAGAGTTTTGAG 1449

ZmKSL5-d5 AGGGAGTACAAGGAGGGCAAGTTGAACATTGTTTCTCTCCTCGTTCTTTCATGGTGGCTCCA GTCCATA 1518  
ZmKSL5 AGGGAGTACAAGGAGGGCAAGTTGAACATTGTTTCTCTCCTCGTTCTTTCATGGTGGCTCCA GTCCATA 1518

ZmKSL5-d5 TCAGATGCCAGAAAGAAATTACAGAAGCCCATAGACACATGTAGGAGAGACCTCCTAGACTAGTTCTT 1587  
ZmKSL5 TCAGATGCCAGAAAGAAATTACAGAAGCCCATAGACACATGTAGGAGAGACCTCCTAGACTAGTTCTT 1587

ZmKSL5-d5 CGTGAAGAAAAGTGTGTTCTTAGGCCATGCAAGGAATTTCTTGAAAAATGTGCAAGGTCTGCTACTTC 1656  
ZmKSL5 CGTGAAGAAAAGTGTGTTCTTAGGCCATGCAAGGAATTTCTTGAAAAATGTGCAAGGTCTGCTACTTC 1656

ZmKSL5-d5 TTTTACTCGAGAAGTGTGGGTTTAGGTCACCAGTGGAGAGGGCCAAAGAAGTGAATGCAGTGATCAAC 1725  
ZmKSL5 TTTTACTCGAGAAGTGTGGGTTTAGGTCACCAGTGGAGAGGGCCAAAGAAGTGAATGCAGTGATCAAC 1725

ZmKSL5-d5 GAGCCATTTAAAAC TACAAGAAAACCATACACACATGTCTGTTTTGTGA 1773  
ZmKSL5 GAGCCATTTAAAAC TACAAGAAAACCATACACACATGTCTGTTTTGTGA 1773

ZmTPS1-d5 ATGGCCATGCCAGTGAAGCTGACTCCTGCCTCCCTCTCGCTGAAGGCGGTCTGCTGCCGCTTCAGCTCC 69  
ZmTPS1 ATGGCCATGCCAGTGAAGCTGACTCCTGCCTCCCTCTCGCTGAAGGCGGTCTGCTGCCGCTTCAGCTCC 69

ZmTPS1-d5 GGCGGGCATGCGCTGCGCTTCGGCTCGTCCGTACCGTGTGGAGGAGGACGCCGACGCAACGGAGCACG 138  
ZmTPS1 GGAGGGCATGCGCTGCGCTTCGGCTCGTCCGTACCGTGTGGAGGAGGACGCCGACGCAACGGAGCACG 138

ZmTPS1-d5 TCGTCTGCTACGACGCGCTCTGCGGCTGAGGATAGCCCTGGCAAAGCAAGCAACACGATCAAGAAGCA 207  
ZmTPS1 TCGTCTGCTACGACGCGCTCTGCGGCTGAGGATAGCTCTGGCAAAGCAAGCAACACGATCAAGAAGCA 207

ZmTPS1-d5 TCGGAGGCTACGATAAAGACAGCAGCTCCAGCAAGTCGATGTGCTTGAGAACATGGGATTTCTCGGCAT 276  
ZmTPS1 TCGGAGGCTACGATAAAGACAGCAGCTCCAGCAAGTCGATGTGCTTGAGAACATGGGATTTCTCGGCAT 276

ZmTPS1-d5 TTTCTCTGGTGAATCAAAATGCATCCTTGACAGGACATACAGAAGTTGGTTACAGAACATGAGGAAAT 345  
ZmTPS1 TTTCTCTGGTGAATCAAAATGCATCCTTGACAGGACATACAGAAGTTGGTTACAGAACATGAGGAAAT 345

ZmTPS1-d5 ATGCTGGACACAATGACCTGTGCGATGGCATTTCGTATTCTAAGGTTGAATGGATACAATGTCTCTTCT 414  
ZmTPS1 ATGCTGGACACAATGACCTGTGCGATGGCATTTCGTATTCTAAGGTTGAATGGATACAATGTCTCTTCT 414

ZmTPS1-d5 GATGAGTTGTATCATGTTGTTGAAGCTTCCGGCTCCATAAATTCCTTGGAGGATATCTCAATGATACA 483  
ZmTPS1 GATGAGTTGTATCATGTTGTTGAAGCTTCCGGACTCCATAAATTCCTTGGAGGATATCTCAATGATACA 483

ZmTPS1-d5 AGAACCTTGTAGAAATACACAAGGCTCGACAGTTAGTATCTCTGAAGATGAGTCTATCCTGGATAGC 552  
ZmTPS1 AGAACCTTGTAGAAATACACAAGGCTCGACAGTTAGTATCTCTGAAGATGAGTCTATCCTGGATAGC 552

ZmTPS1-d5 ATAGGCTCAAGGTCAGTACCTTACTGAGGGAACAACATAGAGTCTGGTGGTCTCTACGAAAACCTTCA 621  
ZmTPS1 ATAGGCTCAAGGTCAGTACCTTACTGAGGGAACAACATAGAGTCTGGTGGTCTCTACGAAAACCTTCA 621

ZmTPS1-d5 CTCTTTAAAGAGGTGGAACATGCTTTGGACGGTCCCTTCTACACCACATTTGGACCGTCTATACCATAGG 690  
ZmTPS1 CTCTTTAAAGAGGTGGAACATGCTTTGGACGGTCCCTTCTACACCACATTTGGACCGTCTATACCATAGG 690

ZmTPS1-d5 TGGAACATCGAAAATTTCAATATTATAGAGCAGCAGATGCTAGAGACACCATACTTGTCAAAATCAACAT 759  
ZmTPS1 TGGAACATCGAAAATTTCAATATTATAGAGCAGCAGATGCTAGAGACACCATACTTGTCAAAATCAACAT 759

ZmTPS1-d5 ACCAGTAGAGATATCTAGCGTTGGGATTAGAGACTCAGTTCCTCTCAGTTTACTTACCAGCAAGAA 828  
ZmTPS1 ACCAGTAGAGATATCTAGCGTTGGGATTAGAGACTCAGTTCCTCTCAGTTTACTTACCAGCAAGAA 828

ZmTPS1-d5 CTTCAACATCTTGAAGTGGGTGAAAGAGTGCAGGTTAGACCAGCTACATTTGCGGACAGAAAGTTG 897  
ZmTPS1 CTTCAACATCTTGAAGTGGGTGAAAGAGTGCAGGTTAGACCAGCTACATTTGCGGACAGAAAGTTG 897

ZmTPS1-d5 GCATACCTTCTACTTGTCTGCTGCTGGCACCATGTTCTCTCTGTGAGCTGTCTGATGCTCGCACTTTGTGG 966  
ZmTPS1 GCATACCTTCTACTTGTCTGCTGCTGGCACCATGTTCTCTCTGTGAGCTGTCTGATGCTCGCACTTTGTGG 966

ZmTPS1-d5 GCCAAAAATGGTGTGCTCAAACTATTGTTGACGACTCTTTGATGTTGCGGATC AAAAGAAGA AACTT 1035  
ZmTPS1 GCCAAAAATGGTGTGCTCAAACTATTGTTGACGACTCTTTGATGTTGCGGATC AAAAGAAGA AACTT 1035

ZmTPS1-d5 GAAAACCTTGTCATGTTGGTTGAGCTGTGGGACGAGCATCACAAGTTGAGTTCTACTCAGAACAAGT 1104  
ZmTPS1 GAAAACCTTGTCATGTTGGTTGAGCTGTGGGACGAGCATCACAAGTTGAGTTCTACTCAGAACAAGT 1104

ZmTPS1-d5 GAGATTATATTTTCTTCAATTTATGACTCAGTTAACC AACTTGGTGAAAAGGCTTCTTTGGTACAAGAC 1173  
ZmTPS1 GAGATTATATTTTCTTCAATTTATGACTCAGTTAACC AACTTGGTGAAAAGGCTTCTTTGGTACAAGAC 1173

ZmTPS1-d5 CGCAGTGTTACCAAACACCTAGTAGAAAATATGGTTGGATTTGCTAAAGTCTATGATGACAGAGGTAAG 1242  
ZmTPS1 CGCAGTGTTACCAAACACCTAGTAGAAAATATGGTTGGATTTGCTAAAGTCTATGATGACAGAGGTAAG 1242

ZmTPS1-d5 TGGCGTTTGAGCAAAATATGTGCCAACAGAGGAGGAATACATGATAAATGCAATTTAACATTTGACTA 1311  
ZmTPS1 TGGCGTTTGAGCAAAATATGTGCCAACAGAGGAGGAATACATGATAAATGCAATTTAACATTTGACTA 1311

ZmTPS1-d5 GGCCCCATTGTATTGCCAGCATTATATTTTGTGGGCCAAAGATCTCGAGTCTATTGTTAAAGATCCA 1380  
ZmTPS1 GGCCCCATTGTATTGCCAGCATTATATTTTGTGGGCCAAAGATCTCGAGTCTATTGTTAAAGATCCA 1380

ZmTPS1-d5 GAATATGATGAATGTTTACTGACTAATGAGCACAATGTTGTCGCCCTCTGAAATGATGTTTCTGAG 1449  
ZmTPS1 GAATATGATGAATGTTTACTGACTAATGAGCACAATGTTGTCGCCCTCTGAAATGATGTTTCTGAG 1449

ZmTPS1-d5 AGGGAGTACAAAGAGGCAAGTTGAATAGTGTTCCTCTCCTCGTTCTCATGGTGGCTCCATGTCCATA 1518  
ZmTPS1 AGGGAGTACAAAGAGGCAAGTTGAATAGTGTTCCTCTCCTCGTTCTCATGGTGGCTCCATGTCCATA 1518

ZmTPS1-d5 TCAGACGCCAAGAGGAAATACAGAAGCCCATAGACACATGCAGAAGAGACCTCCTAAGTTT AGTTCTT 1587  
ZmTPS1 TCAGACGCCAAGAGGAAATACAGAAGCCCATAGACACATGCAGAAGAGACCTCCTAAGTTT AGTTCTT 1587

ZmTPS1-d5 CGTGAAGAAAGTGTGTTCTTAGGCCCTGCAAGGAATATTTCTGGAAAATGTGCAAGGTGTGCTACTTC 1656  
ZmTPS1 CGTGAAGAAAGTGTGTTCTTAGGCCCTGCAAGGAATATTTCTGGAAAATGTGCAAGGTGTGCTACTTC 1656

ZmTPS1-d5 TTCTACTCGACACTGATGGGTTT AGCTCAC AAGTGGAGAGGGCTAAAGAAGTGGATGCAAGTATCAAT 1725  
ZmTPS1 TTCTACTCGACACTGATGGGTTT AGCTCAC AAGTGGAGAGGGCTAAAGAAGTGGATGCAAGTATCAAT 1725

ZmTPS1-d5 GAGCCACTAAAGCTACAAGGAAGTCATACGCTGGTGTCTGATGTGTGA 1773  
ZmTPS1 GAGCCACTAAAGCTACAAGGAAGTCATACGCTGGTGTCTGATGTGTGA 1773



ZmKSL3 CACAGCGTGGGTTTCTATGGTGCCAGTGCAGGCTCTCATCAGACTCCCCGCTTCCACAGTG 278  
ZmKSL3 genomic-d5 CACAGCGTGGGTTTCTATGGTGCCAGTGCAGGCTCTCATCAGACTCCCCGCTTCCACAGTG 1217  
ZmKSL3-genomic-B73 CACAGCGTGGGTTTCTATGGTGCCAGTGCAGGCTCTCATCAGACTCCCCGCTTCCACAGTG 1323

ZmKSL3 TGTGTAGTGGACTACTGCAGAACAGCAGGATGATGGATCTTGGGGTGTGACCCAATCTGACTC 341  
ZmKSL3 genomic-d5 TGTGTAGTGGATATGTCAGAAATCAGCAGGATGATGGATCTTGGGGTGTGACCCAATCTGACTC 1280  
ZmKSL3-genomic-B73 TGTGTAGTGGATACTGCAGAACAGCAGGATGATGGATCTTGGGGTGTGACCCAATCTGACTC 1386

ZmKSL3 ATCGGTCAGCAAGGATGTTCTCCTATCCACGTTGGCATGTGTTCTTGCCTTGAAGAGATGGAA 404  
ZmKSL3 genomic-d5 ATCGGTCAGCAAGGATGTTCTCCTATCCACGTTGGCATGTGTTCTTGCCTTGAAGAGATGGAA 1343  
ZmKSL3-genomic-B73 ATCGGTCAGCAAGGATGTTCTCCTATCCACGTTGGCATGTGTTCTTGCCTTGAAGAGATGGAA 1449

ZmKSL3 TGTGGCAGAGAGAACATTTGGAGAGG----- 431  
ZmKSL3 genomic-d5 TGTGGCAGAGAGAACATTTGGAGAGGATAAATTGAGGTTTCATCGAGAGAGATTTGAAGGTG 1406  
ZmKSL3-genomic-B73 TGTGGCAGAGAGAACATTTGGAGAGGATAAATTGAGGTTTCATCGAGAGAGATTTGAAGGTG 1512

ZmKSL3 ----- 431  
ZmKSL3 genomic-d5 TTTTATTTTCAGTGAATAATGATGCTGACAGTCACTTTTTTTT-----TCTTTTTTTGTT 1461  
ZmKSL3-genomic-B73 TTTTATTTTCAGTGAATAATGATGCTGACATTTCACTTTTTTTTCTTTTTCTTTTTTTTTGTT 1575

ZmKSL3 ----- 485  
ZmKSL3 genomic-d5 TTGGACAGGACTGCATTTTCATCGGGAGGAATTTCTCTGTTGCTATGGACAGCAGTTCACTTC 1524  
ZmKSL3-genomic-B73 TTGGACAGGACTGCATTTTCATCGGGAGGAATTTCTCTGTTGCTATGGACAGCAGTTCACTTC 1638

ZmKSL3 TCCTATAGGTTTCAACTTCACTTTCTGTTTGGTTTGCCTAGCCTCGGCATTGATATGGGTTTAGA 548  
ZmKSL3 genomic-d5 TCCTATAGGTTTCAACTTCACTTTCTGTTTGGTTTGCCTAAGCCTCGGCATTGATATGGGTTTAGA 1587  
ZmKSL3-genomic-B73 TCCTATAGGTTTCAACTTCACTTTCTGTTTGGTTTGCCTAGCCTCGGCATTGATATGGGTTTAGA 1701

ZmKSL3 ATTTCTGTAAAGACAAATGATGCTGTGGCATTCTTCCACCGCCGGGAGATGGAATTGAAAAG 611  
ZmKSL3 genomic-d5 ATTTCTGTAAAGACAAATGATGCTGTGGCATTCTTCCACCGCCGGGAGATGGAATTGAAAAG 1650  
ZmKSL3-genomic-B73 ATTTCTGTAAAGACAAATGATGCTGTGGCATTCTTCCACCGCCGGGAGATGGAATTGAAAAG 1764

ZmKSL3 G----- 612  
ZmKSL3 genomic-d5 GTTTGTCAGTACTTATCCGTCATGAAAAATCATCTAGTATTTCCCTTGTGTTTGCATGCCA 1713  
ZmKSL3-genomic-B73 GTTTGTCAGTACTTATCCGTCATGAAAAATCATCTAGTATTTCCCTTGTGTTTGCATGCCA 1827

ZmKSL3 ----- 612  
ZmKSL3 genomic-d5 GGGAGAACTTTTATCTTATGAGCAGATTTACCGTCGTTTGTATTTTCTTGTTTTTTGA 1776  
ZmKSL3-genomic-B73 GGGAGAACTTTTATCTTATGAGCAGATTTACCGTCGTTTGTATTTTCTTGTTTTTTGA 1890

ZmKSL3 ----- 612  
ZmKSL3 genomic-d5 GAACAAAGGAATTTGCATTAAATTTGTCAGATAACCATAGTTTGCAGAAAGGAGTGTGATC 1839  
ZmKSL3-genomic-B73 GAACAAAGGAATTTGCATTAAATTTGTCAGATAACCATAGTTTGCAGAAAGGAGTGTGATC 1950

ZmKSL3 ----- 612  
ZmKSL3 genomic-d5 ATCTAGTATTTCCCTTGTGTTTGCATGCCAGGGAGAATTTTATCTTATGAGCAGATTTACC 1902  
ZmKSL3-genomic-B73 ----- 1950

ZmKSL3 ----- 612  
ZmKSL3 genomic-d5 GTCGTTTGTGATGGTTGTTACATTGACTTTTGTAGTAAACCAGAATTTGACATGAAC TTGTGAA 1965  
ZmKSL3-genomic-B73 -----TGATGGTTGTTACATTGACTTTTGTAGTAAACCAGAATTTGACATGAAC TTGTGAA 2006

ZmKSL3 ----- 637  
ZmKSL3 genomic-d5 TAATGTACTGAAAGTCTGATAGTTGTTTTAATTTAGGCTGGCTGTGGATAGTTCTTTTGGAA 2028  
ZmKSL3-genomic-B73 TAATGTACTGAAAGTCTGATAGTTGTTTTAATTTAGGCTGGCTGTGGATAGTTCTTTTGGAA 2069

ZmKSL3 GAAAAGCATATATGGCTTTTATCCCAGAAGGATTCGGAATATGCTGGACTGGGATCAAGTTA 700  
ZmKSL3 genomic-d5 GAAAAGCATATATGGCTTTTATCCCAGAAGGATTCGGAATATGCTGGACTGGGATCAAGTTA 2091  
ZmKSL3-genomic-B73 GAAAAGCATATATGGCTTTTATCCCAGAAGGATTCGGAATATGCTGGACTGGGATCAAGTTA 2132

ZmKSL3 TGAAGTTTTCAGAGGAAGAATGGATCATTGTTTCAGCACCTCTTCCACAAC TGTGTTGCATTAA 763  
ZmKSL3 genomic-d5 TGAAGTTTTCAGAGGAAGAATGGATCATTGTTTCAGCACCTCTTCCACAAC TGTGTTGCATTAA 2154  
ZmKSL3-genomic-B73 TGAAGTTTTCAGAGGAAGAATGGATCATTGTTTCAGCACCTCTTCCACAAC TGTGTTGCATTAA 2195

ZmKSL3 TCCACAAATACAACGACCAAGCCCTTCAATACCTAAATTTGCTTGTCAATGAATTTGGCAGTG 826  
ZmKSL3 genomic-d5 TCCACAAATACAACGACCAAGCCCTTCAATACCTAAATTTGCTTGTCAATGAATTTGGCAGTG 2217  
ZmKSL3-genomic-B73 TCCACAAATACAACGACCAAGCCCTTCAATACCTAAATTTGCTTGTCAATGAATTTGGCAGTG 2258

ZmKSL3 CAG----- 829  
ZmKSL3 genomic-d5 CAGGTGTGATGCTGTACTTTTCTATCTCACAGTCGTTCTAGCATTGGAC TGTGGTTAATAC 2280  
ZmKSL3-genomic-B73 CAGGTGTGATGCTGTACTTTTCTATCTCACAGTCGTTCTAGCATTGGAC TGTGGTTAATAC 2321

ZmKSL3 ----- 862  
ZmKSL3 genomic-d5 CTAATGGCTAATGGCATAAGGCTTTTGCAGTACCAGCAATGTATCCTTCAAGGGTACATTGTC 2343  
ZmKSL3-genomic-B73 CTAATGGCTAATGGCATAAGGCTTTTGCAGTACCAGCAATGTATCCTTCAAGGGTACATTGTC 2384

ZmKSL3 AGCTTTCAATGGTGGACGCGCTTGAATAATGGGAATTTCTCAGCGCTTTGTGAGTGAATAG 925  
ZmKSL3 genomic-d5 AGCTTTCAATGGTGGACGCGCTTGAATAATGGGAATTTCTCAGCGCTTTGTGAGTGAATAG 2406  
ZmKSL3-genomic-B73 AGCTTTCAATGGTGGACGCGCTTGAATAATGGGAATTTCTCAGCGCTTTGTGAGTGAATAG 2447



ZmKSL3 AAAGCATCCTGGACATGGCATACAA 950  
ZmKSL3 genomic-d5 AAAGCATCCTGGACATGGCATACAAGTAATTGTCTTGTGGAAAAATTTTATATCTTCTTTAG 2469  
ZmKSL3-genomic-B73 AAAGCATCCTGGACATGGCATACAAGTAATTGTCTTGTGGAAAAATTTTATATCTTCTTTAG 2510

ZmKSL3 2,540 2,560 2,580  
ZmKSL3 genomic-d5 2,600 2,620 2,640  
ZmKSL3-genomic-B73 2,600 2,620 2,640

ZmKSL3 TTGCTGGTTACAGAATGATGAGGAA 975  
ZmKSL3 genomic-d5 TAACTTATATTATATACTTGACTACATCCATCTTGCAGTTGCTGGTTACAGAATGATGAGGAA 2532  
ZmKSL3-genomic-B73 TAACTTATATTATATACTTGACTACATCCATCTTGCAGTTGCTGGTTACAGAATGATGAGGAA 2573

ZmKSL3 2,660 2,680 2,700  
ZmKSL3 genomic-d5 2,660 2,680 2,700  
ZmKSL3-genomic-B73 2,660 2,680 2,700

ZmKSL3 CTCATGATGGACATAGCAACATTTGCAATGGCATTTCGCCTTTTGAGGATGAATGGTTACGAT 1038  
ZmKSL3 genomic-d5 CTCATGATGGACATAGCAACATTTGCAATGGCATTTCGCCTTTTGAGGATGAATGGTTACGAT 2595  
ZmKSL3-genomic-B73 CTCATGATGGACATAGCAACATTTGCAATGGCATTTCGCCTTTTGAGGATGAATGGTTACGAT 2636

ZmKSL3 2,720 2,740 2,760  
ZmKSL3 genomic-d5 2,720 2,740 2,760  
ZmKSL3-genomic-B73 2,720 2,740 2,760

ZmKSL3 GTTTCCTCAG 1048  
ZmKSL3 genomic-d5 GTTTCCTCAGGTAATTCAGGACTCGCAAAATCTGGTATTCCAGACAGCATTGGATTTCTTTGG 2658  
ZmKSL3-genomic-B73 GTTTCCTCAGGTAATTCAGGACTCGCAAAATCTGGTATTCCAGACAGCATTGGATTTCTTTGG 2699

ZmKSL3 2,780 2,800 2,820  
ZmKSL3 genomic-d5 2,780 2,800 2,820  
ZmKSL3-genomic-B73 2,780 2,800 2,820

ZmKSL3 ATGAGCTGTCTCACGTTGCTGGAGCTTCCAC 1079  
ZmKSL3 genomic-d5 CATTGACGAAACTAATGACTAATTTACATCAGATGAGCTGTCTCACGTTGCTGGAGCTTCCAC 2721  
ZmKSL3-genomic-B73 CATTGACGAAACTAATGACTAATTTACATCAGATGAGCTGTCTCACGTTGCTGGAGCTTCCAC 2762

ZmKSL3 2,840 2,860 2,880  
ZmKSL3 genomic-d5 2,840 2,860 2,880  
ZmKSL3-genomic-B73 2,840 2,860 2,880

ZmKSL3 TTTCCATGATTCACATAAGGATATTTAAATGATACAAAATCCCTACTGGAATTGTACAAGAC 1142  
ZmKSL3 genomic-d5 TTTCCATGATTCACATAAGGATATTTAAATGATACAAAATCCCTACTGGAATTGTACAAGAC 2784  
ZmKSL3-genomic-B73 TTTCCATGATTCACATAAGGATATTTAAATGATACAAAATCCCTACTGGAATTGTACAAGAC 2825

ZmKSL3 2,900 2,920 2,940 2,960  
ZmKSL3 genomic-d5 2,900 2,920 2,940 2,960  
ZmKSL3-genomic-B73 2,900 2,920 2,940 2,960

ZmKSL3 CTCAAAAGTCACCTTATCAGAAAACGATCTGATCTTAGATCGCATAGGATCCTGGTCTGGCAA 1205  
ZmKSL3 genomic-d5 CTCAAAAGTCACCTTATCAGAAAACGATCTGATCTTAGATCGCATAGGATCCTGGTCTGGCAA 2847  
ZmKSL3-genomic-B73 CTCAAAAGTCACCTTATCAGAAAACGATCTGATCTTAGATCGCATAGGATCCTGGTCTGGCAA 2888

ZmKSL3 2,980 3,000 3,020  
ZmKSL3 genomic-d5 2,980 3,000 3,020  
ZmKSL3-genomic-B73 2,980 3,000 3,020

ZmKSL3 CTTATTGAAGGATAAGATGTGCTGTAGTAGGGTGCAAAAAGACTCGATTTTGGAGAG 1263  
ZmKSL3 genomic-d5 CTTATTGAAGGATAAGATGTGCTGTAGTAGGGTGCAAAAAGACTCGATTTTGGAGAGGTGCT 2910  
ZmKSL3-genomic-B73 CTTATTGAAGGATAAGATGTGCTGTAGTAGGGTGCAAAAAGACTCGATTTTGGAGAGGTGCT 2951

ZmKSL3 3,040 3,060 3,080  
ZmKSL3 genomic-d5 3,040 3,060 3,080  
ZmKSL3-genomic-B73 3,040 3,060 3,080

ZmKSL3 1263  
ZmKSL3 genomic-d5 GCAAACAAAATTTAAATTCATTTTCACCTTGGAGGTTTCAGTTTATGTCGTGTTTTGTGAT 2973  
ZmKSL3-genomic-B73 GCAAACAAAATTTAAATTCATTTTCACCTTGGAGGTTTCAGTTTATGTCGTGTTTTGTGAT 3014

ZmKSL3 3,100 3,120 3,140  
ZmKSL3 genomic-d5 3,100 3,120 3,140  
ZmKSL3-genomic-B73 3,100 3,120 3,140

ZmKSL3 ATCGAGTATGCTGTTAATTTCCCTTGTATTCCACACTGGAGCGTCTAGAACAAGA 1321  
ZmKSL3 genomic-d5 TTCAGATCGAGTATGCTGTTAATTTCCCTTGTATTCCACACTGGAGCGTCTAGAACAAGA 3036  
ZmKSL3-genomic-B73 TTCAGATCGAGTATGCTGTTAATTTCCCTTGTATTCCACACTGGAGCGTCTAGAACAAGA 3077

ZmKSL3 3,160 3,180 3,200  
ZmKSL3 genomic-d5 3,160 3,180 3,200  
ZmKSL3-genomic-B73 3,160 3,180 3,200

ZmKSL3 GAAACATCGAACATTTTGTATGCTTGGGGTCTCTGATGCTAACAACAAAATCCTC 1376  
ZmKSL3 genomic-d5 GAAACATCGAACATTTTGTATGCTTGGGGTCTCTGATGCTAACAACAAAATCCTCGTAAGATT 3099  
ZmKSL3-genomic-B73 GAAACATCGAACATTTTGTATGCTTGGGGTCTCTGATGCTAACAACAAAATCCTCGTAAGATT 3140

ZmKSL3 3,220 3,240 3,260  
ZmKSL3 genomic-d5 3,220 3,240 3,260  
ZmKSL3-genomic-B73 3,220 3,240 3,260

ZmKSL3 1376  
ZmKSL3 genomic-d5 TTATTTTCACAGAAGTACATCTCATCAGTTTTAAGTAGTTTAGAGTACCAATGTTGT 3157  
ZmKSL3-genomic-B73 TTATTTTCACAGAAGTACATCTCATCAGTTTTAAGTAGTTTAGATGCTGCTACCAATGTTGT 3203

ZmKSL3 3,280 3,300 3,320  
ZmKSL3 genomic-d5 3,280 3,300 3,320  
ZmKSL3-genomic-B73 3,280 3,300 3,320

ZmKSL3 ATCTTTTCGTATCAATCAAGAATTCCTAGCTTTGGCAGTCAAGAT 1422  
ZmKSL3 genomic-d5 ACACCTTTGTTGTATCAGATCTTTTCGTATCAATCAAGAATTCCTAGCTTTGGCAGTCAAGAT 3220  
ZmKSL3-genomic-B73 ACACCTTTGCTGTATCAGATCTTTTCGTATCAATCAAGAATTCCTAGCTTTGGCAGTCAAGAT 3266

ZmKSL3 3,340 3,360 3,380 3,400  
ZmKSL3 genomic-d5 3,340 3,360 3,380 3,400  
ZmKSL3-genomic-B73 3,340 3,360 3,380 3,400

ZmKSL3 TTCAGTTTCTCTCAACGTGTTACCGGGATGAACTTCGGCATCTTGATAG 1472  
ZmKSL3 genomic-d5 TTCAGTTTCTCTCAACGTGTTACCGGGATGAACTTCGGCATCTTGATAGGTAATCTAAATGC 3283  
ZmKSL3-genomic-B73 TTCAGTTTCTCTCAACGTGTTACCGGGATGAACTTCGGCATCTTGATAGGTAATCTAAATGC 3329

ZmKSL3 3,420 3,440 3,460  
ZmKSL3 genomic-d5 3,420 3,440 3,460  
ZmKSL3-genomic-B73 3,420 3,440 3,460

ZmKSL3 1472  
ZmKSL3 genomic-d5 CATATGTTCACTTTTATTTTAAATTTCTCCCTTGGGTAATTTGATTAACTTGTGCAACAG 3346  
ZmKSL3-genomic-B73 CATATGTTCACTTTTATTTTAAATTTCTCCCTTGGGTAATTTGATTAACTTGTGCAACAG 3392

ZmKSL3 3,480 3,500 3,520  
ZmKSL3 genomic-d5 3,480 3,500 3,520  
ZmKSL3-genomic-B73 3,480 3,500 3,520

ZmKSL3 TTGGGTGAAGGAGAACAAGCTGGACCAGCTACAATTTGCTCGGCAGAAACTGACATATTGCTA 1535  
ZmKSL3 genomic-d5 TTGGGTGAAGGAGAACAAGCTGGACCAGCTACAATTTGCTCGGCAGAAACTGACATATTGCTA 3409  
ZmKSL3-genomic-B73 TTGGGTGAAGGAGAACAAGCTGGACCAGCTACAATTTGCTCGGCAGAAACTGACATATTGCTA 3455

ZmKSL3 3,540 3,560 3,580  
ZmKSL3 genomic-d5 3,540 3,560 3,580  
ZmKSL3-genomic-B73 3,540 3,560 3,580

ZmKSL3 TCTGTCTGCTGCTACCGTATTTTCTTCTGAATTGTCTGACGCTCGCATTTTCATGGGCCAA 1598  
ZmKSL3 genomic-d5 TCTGTCTGCTGCTACCGTATTTTCTTCTGAATTGTCTGACGCTCGCATTTTCATGGGCCAA 3472  
ZmKSL3-genomic-B73 TCTGTCTGCTGCTACCGTATTTTCTTCTGAATTGTCTGACGCTCGCATTTTCATGGGCCAA 3518

ZmKSL3 3,600 3,620 3,640  
ZmKSL3 genomic-d5 3,600 3,620 3,640  
ZmKSL3-genomic-B73 3,600 3,620 3,640

ZmKSL3 AAATGGTGTCTCAACACTGTGGTTGATGACTTCTTCGATGTTGGTGGATCAAAAGAAGAATT 1661  
ZmKSL3 genomic-d5 AAATGGTGTCTCAACACTGTGGTTGATGACTTCTTCGATGTTGGTGGATCAAAAGAAGAATT 3535  
ZmKSL3-genomic-B73 AAATGGTGTCTCAACACTGTGGTTGATGACTTCTTCGATGTTGGTGGATCAAAAGAAGAATT 3581

ZmKSL3 3,660 3,680 3,700  
ZmKSL3 genomic-d5 3,660 3,680 3,700  
ZmKSL3-genomic-B73 3,660 3,680 3,700

ZmKSL3 AGAAAACCTGATAGCACTAGTTGAGAA 1688  
ZmKSL3 genomic-d5 AGAAAACCTGATAGCACTAGTTGAGAAAGTATGCTACTCTTTTATGAAGTAACACTGATCACT 3598  
ZmKSL3-genomic-B73 AGAAAACCTGATAGCACTAGTTGAGAAAGTATGCTACTCTTTTATGAAGTAACACTGATCACT 3644

ZmKSL3 3,720 3,740 3,760 3,780  
ZmKSL3 genomic-d5 3,720 3,740 3,760 3,780  
ZmKSL3-genomic-B73 3,720 3,740 3,760 3,780

ZmKSL3 ATGGCATGGGCACCAT 1704  
ZmKSL3 genomic-d5 TATGCATGGCTAATTAATCTCCTGTTCTGGCTGATGGTTTTTCATAGATGGCATGGCACCAT 3661  
ZmKSL3-genomic-B73 TATGCATGGCTAATTAATCTCCTGTTCTGGCTGATGGTTTTTCATAGATGGCATGGGCACCAT 3707

ZmKSL3 GCAGTTGAGTTCTATTCGGAACAGGTGAAAATAGTATTTTCTGCATTTTATACAACAGTGAAC 1767  
ZmKSL3 genomic-d5 GCAGTTGAGTTCTATTCGGAACAGGTGAAAATAGTATTTTCTGCATTTTATACAACAGTGAAC 3724  
ZmKSL3-genomic-B73 GCAGTTGAGTTCTATTCGGAACAGGTGAAAATAGTATTTTCTGCATTTTATACAACAGTGAAC 3770

ZmKSL3 CATCTTGGAGCAATGGCTTCTGCAGCACAAAGGCCGTGATCTTACAAACCACCTAGTAGAAAATA 1830  
ZmKSL3 genomic-d5 CATCTTGGAGCAATGGCTTCTGCAGCACAAAGGCCGTGATCTTACAAACCACCTAGTAGAAAATA 3787  
ZmKSL3-genomic-B73 CATCTTGGAGCAATGGCTTCTGCAGCACAAAGGCCGTGATCTTACAAACCACCTAGTAGAAAATA 3833

ZmKSL3 - - - - - 1830  
ZmKSL3 genomic-d5 GTAAGTCTGATGTGCGTCCCAATAATCT - GCATTCGGTTATGTTAAGCACTGACAACCTGAGAA 3849  
ZmKSL3-genomic-B73 GTAAGTCTGATGTGCGTCCCAATAATCTTGCATTCGGTTATGTTAAGCACTGACAACCTGAGAA 3896

ZmKSL3 - - - - - TGGCTGGATTGTTAAGATCTATGATGGTCGAGGCAGAATGGCAGAGATGCC 1882  
ZmKSL3 genomic-d5 CACATTTGCAGTGGCTGGATTTGTTAAGATCTATGATGGTCGAGGCAGAATGGCAGAGATGCC 3912  
ZmKSL3-genomic-B73 CACATTTGCAGTGGCTGGATTTGTTAAGATCTATGATGGTCGAGGCAGAATGGCAGAGATGCC 3959

ZmKSL3 AATATGTACCAACAGTTGAAGAATACATGACAAATGCTGTTGTCTCATTGTCAGTGGGCCCAA 1945  
ZmKSL3 genomic-d5 AATATGTACCAACAGTTGAAGAATACATGACAAATGCTGTTGTCTCATTGTCAGTGGGCCCAA 3975  
ZmKSL3-genomic-B73 AATATGTACCAACAGTTGAAGAATACATGACAAATGCTGTTGTCTCATTGTCAGTGGGCCCAA 4022

ZmKSL3 TTGTGCTCCAGCATTGTATTTTGTAGGGCAAGAGCTATTAGAGCATGCTGTCAAAGATGAAG 2008  
ZmKSL3 genomic-d5 TTGTGCTCCAGCATTGTATTTTGTAGGGCAAGAGCTATTAGAGCATGCTGTCAAAGATGAAG 4038  
ZmKSL3-genomic-B73 TTGTGCTCCAGCATTGTATTTTGTAGGGCAAGAGCTATTAGAGCATGCTGTCAAAGATGAAG 4085

ZmKSL3 AGTACGATAAATATTTAGGCTAGTGAGCACCTGCGGGAGGCTCCTCAATGACTACCAAAGTT 2071  
ZmKSL3 genomic-d5 AGTACGATAAATATTTAGGCTAGTGAGCACCTGCGGGAGGCTCCTCAATGACTACCAAAGTT 4101  
ZmKSL3-genomic-B73 AGTACGATAAATATTTAGGCTAGTGAGCACCTGCGGGAGGCTCCTCAATGACTACCAAAGTT 4148

ZmKSL3 TAGAG - - - - - 2076  
ZmKSL3 genomic-d5 TAGAGGTATTTGAACCCGTTACACATAAAAGACATGATTGTCTACTATTATTAGCATATCTGC 4164  
ZmKSL3-genomic-B73 TAGAGGTATTTGAACCCGTTACACATAAAAGACATGATTGTCTACTAATTATTAGCATATCTGC 4211

ZmKSL3 - - - - - 2076  
ZmKSL3 genomic-d5 TCGAATTTTCCATATTTTCTCATTATGCTCTAGAATTCACACAGCATTAAACAAAAAATC 4227  
ZmKSL3-genomic-B73 TCGAATTTTCCATATTTTCTCATTATGCTCTAGAATTCACACAGCATTAAACAAAAAATC 4274

ZmKSL3 - - - - - 2076  
ZmKSL3 genomic-d5 CCTTTTTTATTCTAAAATGTGTAAGATTACAAGCACACAAAAGTTATGAAAAACTCACTAAT 4290  
ZmKSL3-genomic-B73 CCTTTTTTATTCTAAAATGTGTAAGATTACAAGCACACAAAAGTTATGAAAAAA-CACTTAT 4335

ZmKSL3 - - - - - 2076  
ZmKSL3 genomic-d5 TTATGAAAAAAGATTTTGAACATGTTCTGTTTCTGGTTATAGCTATTATACTTGACAAGG 4353  
ZmKSL3-genomic-B73 TTATGAAAAAAGATTTTGAACATGTTCTGTTTCTGGTTATAGCTATTATACTTGACAAGG 4398

ZmKSL3 - - - - - 2076  
ZmKSL3 genomic-d5 ATACTGTTGATTGTTGAACCATGATTTATAT - TCACATAA TCTTGCTACTGGAAGATTCTT 4414  
ZmKSL3-genomic-B73 ATACTGTTGATTGTTGAACCATGATTTATAT ATTCACATAA GCTTGCTACTGGAAGATTCTT 4461

ZmKSL3 - - - - - AGGGAAGGCAACCAGGGGAAGCTGAATAGTGTTCCTC 2113  
ZmKSL3 genomic-d5 ACAAAAATCTTTGATCCATGGCTGCAGAGGGAAGGCAACCAGGGGAAGCTGAATAGTGTTCCTC 4477  
ZmKSL3-genomic-B73 ACAAAAATCTTTGATCCATGGCTGCAGAGGGAAGGCAACCAGGGGAAGCTGAATAGTGTTCCTC 4524

ZmKSL3 TACTTGTGCTCCACAGTGGTGGTTCTATGTCCATAGAAGCCGCTAAAAAGGCAATGCAAGAAGT 2176  
ZmKSL3 genomic-d5 TACTTGTGCTCCACAGTGGTGGTTCTATGTCCATAGAAGCCGCTAAAAAGGCAATGCAAGAAGT 4540  
ZmKSL3-genomic-B73 TACTTGTGCTCCACAGTGGTGGTTCTATGTCCATAGAAGCCGCTAAAAAGGCAATGCAAGAAGT 4587

ZmKSL3 CCATAGACGTGTCTAGGAGAGACTTGCTAAGATTGGTTCTCAGGAAAGAAAGTGTCTGTTCCCTA 2239  
ZmKSL3 genomic-d5 CCATAGACGTGTCTAGGAGAGACTTGCTAAGATTGGTTCTCAGGAAAGAAAGTGTCTGTTCCCTA 4603  
ZmKSL3-genomic-B73 CCATAGACGTGTCTAGGAGAGACTTGCTAAGATTGGTTCTCAGGAAAGAAAGTGTCTGTTCCCTA 4650

ZmKSL3 GGCCATGCAAGGAGCTCTTCTGGAAGATGTGT AAGATACTTACCTGTTTTACTCTCAGAATG 2302  
ZmKSL3 genomic-d5 GGCCATGCAAGGAGCTCTTCTGGAAGATGTGT AAGATACTTACCTGTTTTACTCTCAGAATG 4666  
ZmKSL3-genomic-B73 GGCCATGCAAGGAGCTCTTCTGGAAGATGTGT AAGATACTTACCTGTTTTACTCTCAGAATG 4713

ZmKSL3 ATGGATTTAGCTCCCCAAAGGAAATGGTCAGTGCAGTGAATGCTGTTATCAACGAGCCACTCA 2365  
ZmKSL3 genomic-d5 ATGGATTTAGCTCCCCAAAGGAAATGGTCAGTGCAGTGAATGCTGTTATCAACGAGCCACTCA 4729  
ZmKSL3-genomic-B73 ATGGATTTAGCTCCCCAAAGGAAATGGTCAGTGCAGTGAATGCTGTTATCAACGAGCCACTCA 4776

ZmKSL3 AAGTCCAAAACAGTACTACGTTTTTGTCTAGTTTCATCAAGGTAG - - - - - 2409  
ZmKSL3 genomic-d5 AAGTCCAAAATAGTACTACGTTTTTGTCTAGTTTCATCAAGGTAG - - - - - 4773  
ZmKSL3-genomic-B73 AAGTCCAAAACAGTACTACGTTTTTGTCTAGTTTCATCAAGGTAGCGAGGATATCATGTAATTT 4839

ZmKSL3 - - - - - 2409  
ZmKSL3 genomic-d5 - - - - - 4773  
ZmKSL3-genomic-B73 ATCCTGTTTCATATGGATCAGAAGCAACAGCAGCAAGCTTAAGATATTTGTAAAGTTTGTGACTG 4902

ZmKSL3 - - - - - 2409  
ZmKSL3 genomic-d5 - - - - - 4773  
ZmKSL3-genomic-B73 GGCTGCTGTGGATCTGTGAAGCTACAACCTTTGCTGTATGTGGATCAAGGTATTAGGAAGATCT 4965
